# Supplementary material for: Efficacy of perioperative intravenous iron therapy for transfusion in orthopedic surgery: A systematic review and meta-analysis
Source: PLOS journal article supplement (doi:10.1371/journal.pone.0215427), 2019-05-06

## Supporting Information

### S 4 Fig.

#### A. The comparison of hemoglobin (Hb) level between IVIT and control groups

##### ① Hb level at admission

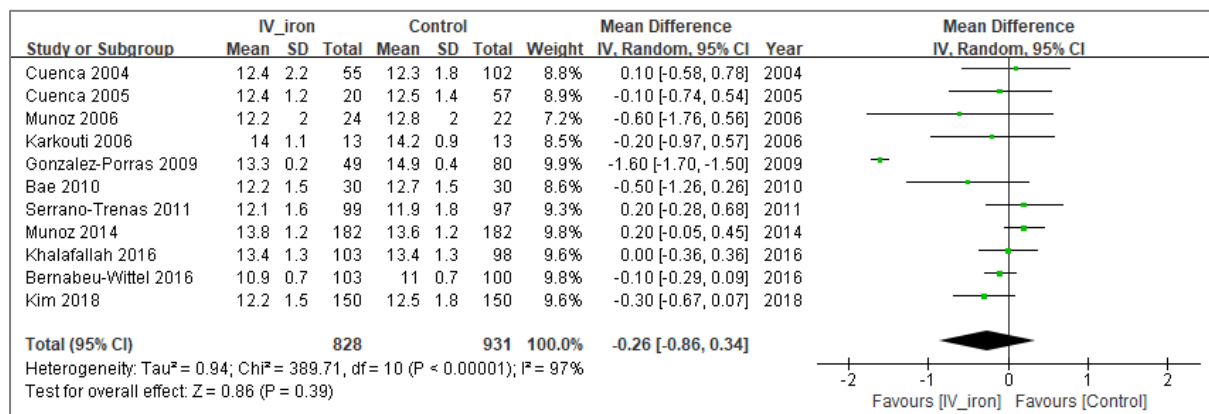

##### ② Hb level on postoperative day 1

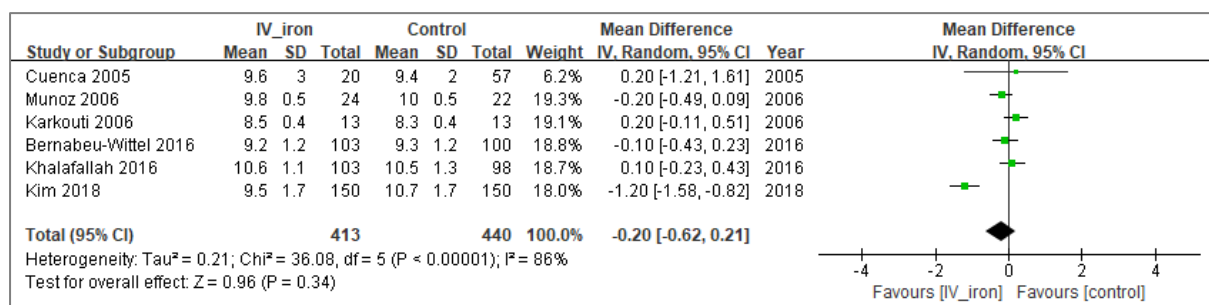

##### ③ Hb level on postoperative day 7

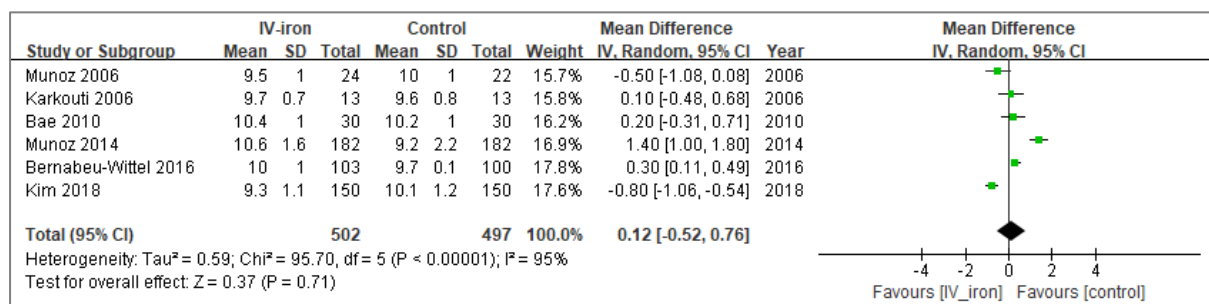

##### ④ Hb level at 6 weeks or 60 days or 12 weeks postoperatively

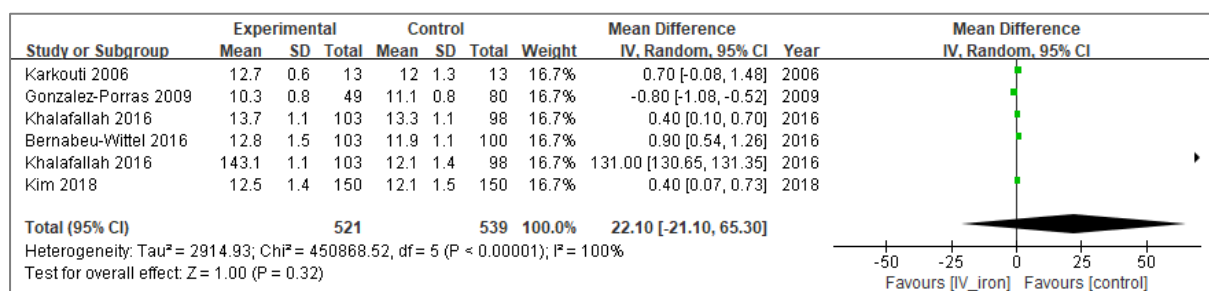

## S 4 Fig.

### B. Comparison of ferritin levels between IVIT and control groups

#### ① Ferritin level at baseline or admission

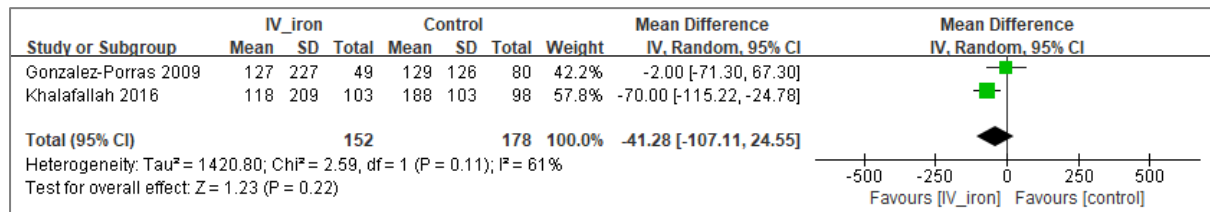

#### ② Ferritin level on postoperative day 1

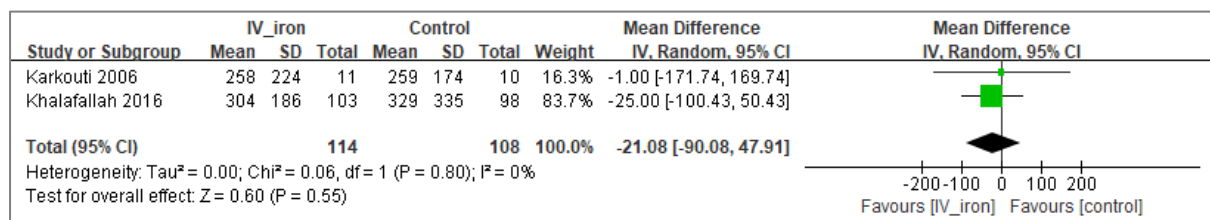

#### ③ Ferritin level on postoperative day 7

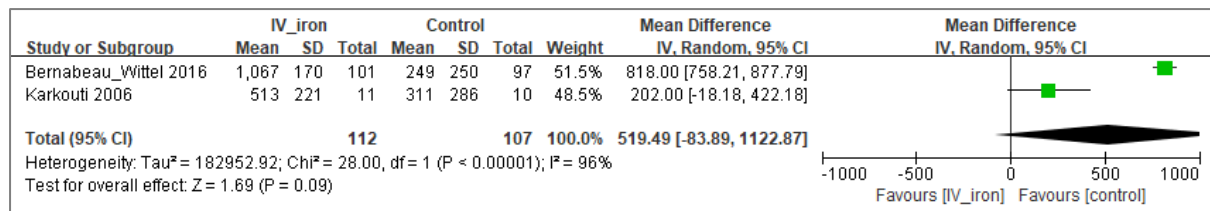

#### ④ Ferritin level at 4 weeks or 60days postoperatively

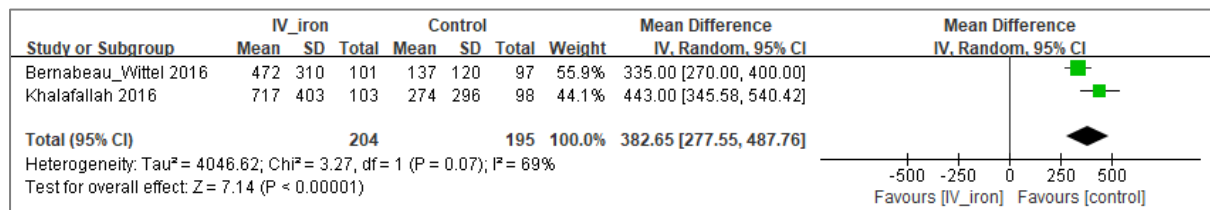

Supplement: S4 (10.1371/journal.pone.0215427.s004) [file journal.pone.0215427.s004]
